# Supplementary material
Source: MDPI journal article supplement (https://www.mdpi.com/2297-8739/9/2/46)
Supplement: s1 [file s1]

# Supplementary Materials

Maria V. Quental<sup>†</sup>, Matheus M. Pereira<sup>†</sup>, Francisca A. e Silva, João A. P. Coutinho  
and Mara G. Freire<sup>\*</sup>

CICECO-Aveiro Institute of Materials, Department of Chemistry, University of  
Aveiro, 3810-193 Aveiro, Portugal.

<sup>†</sup>These authors contributed equally to this work

<sup>\*</sup>Corresponding author

Tel: +351-234-401422; Fax: +351-234-370084; E-mail address: maragfreire@ua.pt

## Synthesis of ILs: Nuclear magnetic resonance (NMR) spectra

*Tetrabutylphosphonium formate, [P<sub>4444</sub>][HCOO]:*

<sup>1</sup>H NMR (D<sub>2</sub>O, 75 MHz, δ/ppm): 0.56 (t, 12H, CH<sub>3</sub>-), 1.16 (m, 16H, -CH<sub>2</sub>-), 1.78 (m, 8H, -CH<sub>2</sub>-P-), 8.08 (s, 1H, CH – COO).

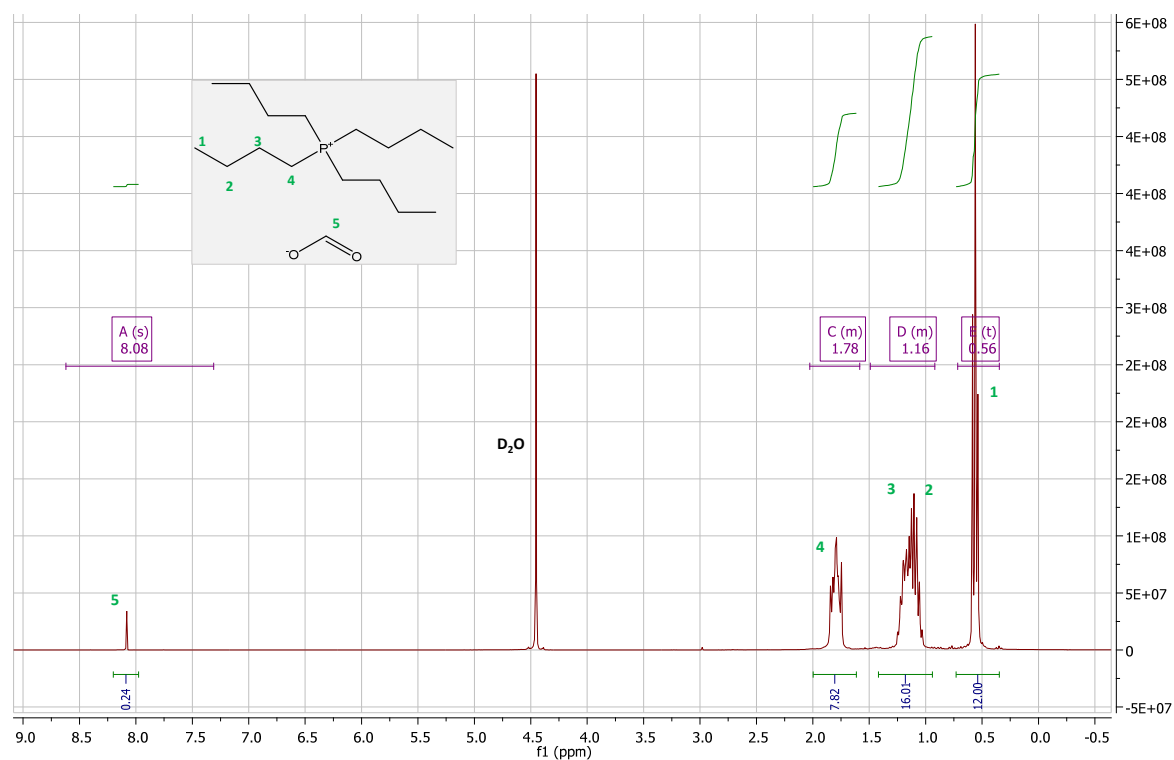

Figure S1 – <sup>1</sup>H NMR spectrum of [P<sub>4444</sub>][HCOO].

Tetrabutylphosphonium acetate,  $[P_{4444}][CH_3COO]$ :

$^1H$  NMR ( $D_2O$ , 75 MHz,  $\delta/ppm$ ): 0.55 (t, 12H,  $CH_3$ -), 1.13 (m, 16H,  $-CH_2-$ ), 1.53 (s, 3H,  $-CH_2-$ ), 1.77 (m, 8H,  $-CH_2-P$ ).

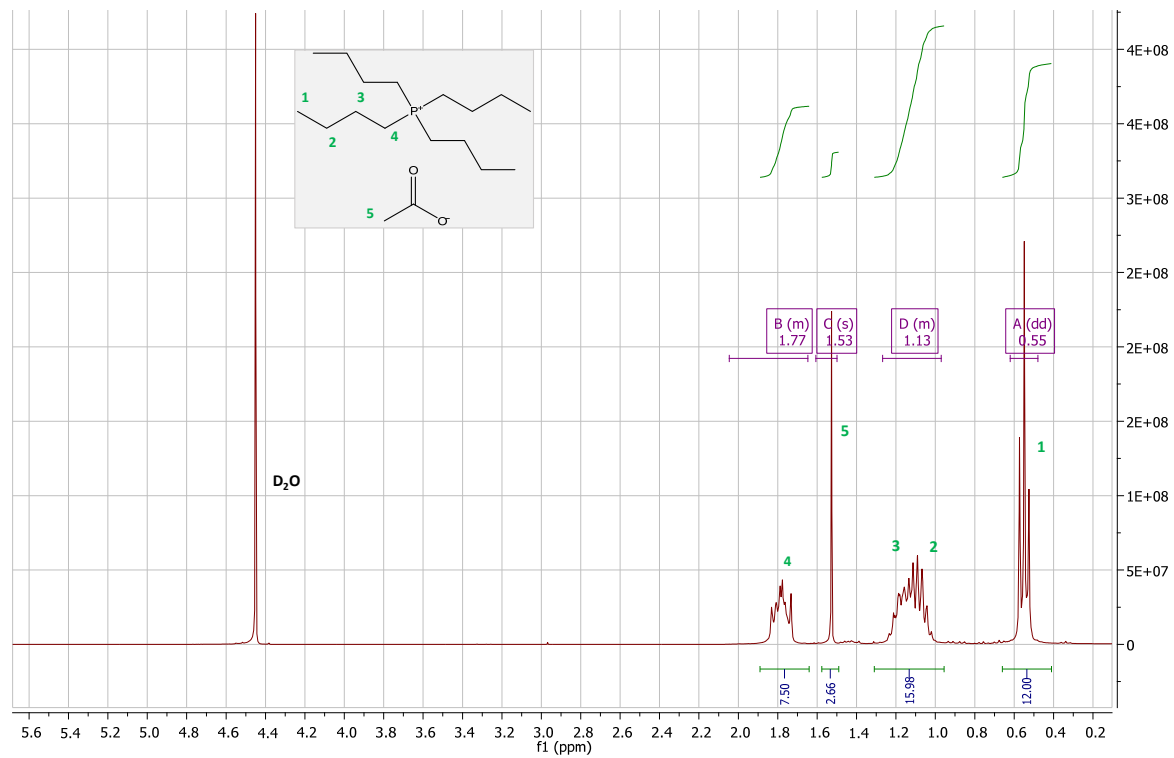

Figure S2 –  $^1H$  NMR spectrum of  $[P_{4444}][CH_3COO]$ .

Tetrabutylammonium formate,  $[N_{4444}][HCOO]$ :

$^1H$  NMR ( $D_2O$ , 75 MHz,  $\delta/ppm$ ): 0.82 (t, 12H,  $CH_3$ -), 1.24 (m, 8H,  $-CH_3$ ), 1.51 (m, 8H,  $-CH_2-$ ), 3.07 (m, 8H,  $-CH_2-N-$ ), 8.33 (s, 1H,  $CH - COO$ ).

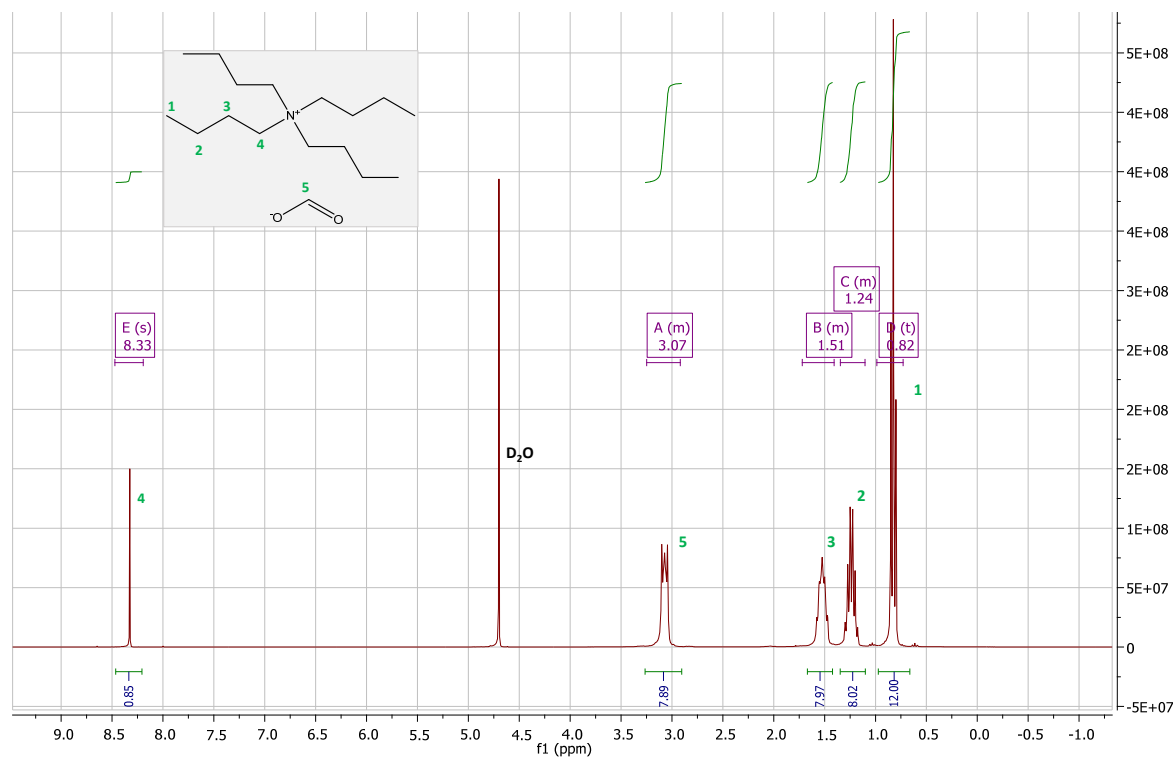

Figure S3 –  $^1H$  NMR spectrum of  $[N_{4444}][HCOO]$ .

Tetrabutylammonium acetate,  $[N_{444}][CH_3COO]$ :

$^1H$  NMR ( $D_2O$ , 75 MHz,  $\delta/ppm$ ): 0.82 (t, 12H,  $-CH_3$ ), 1.23 (m, 8H,  $-CH_2-$ ), 1.52 (m, 8H,  $-CH_2-$ ), 1.78 (s, 3H,  $CH_2-CO-$ ), 3.07 (m, 8H,  $-CH_2-N-$ ).

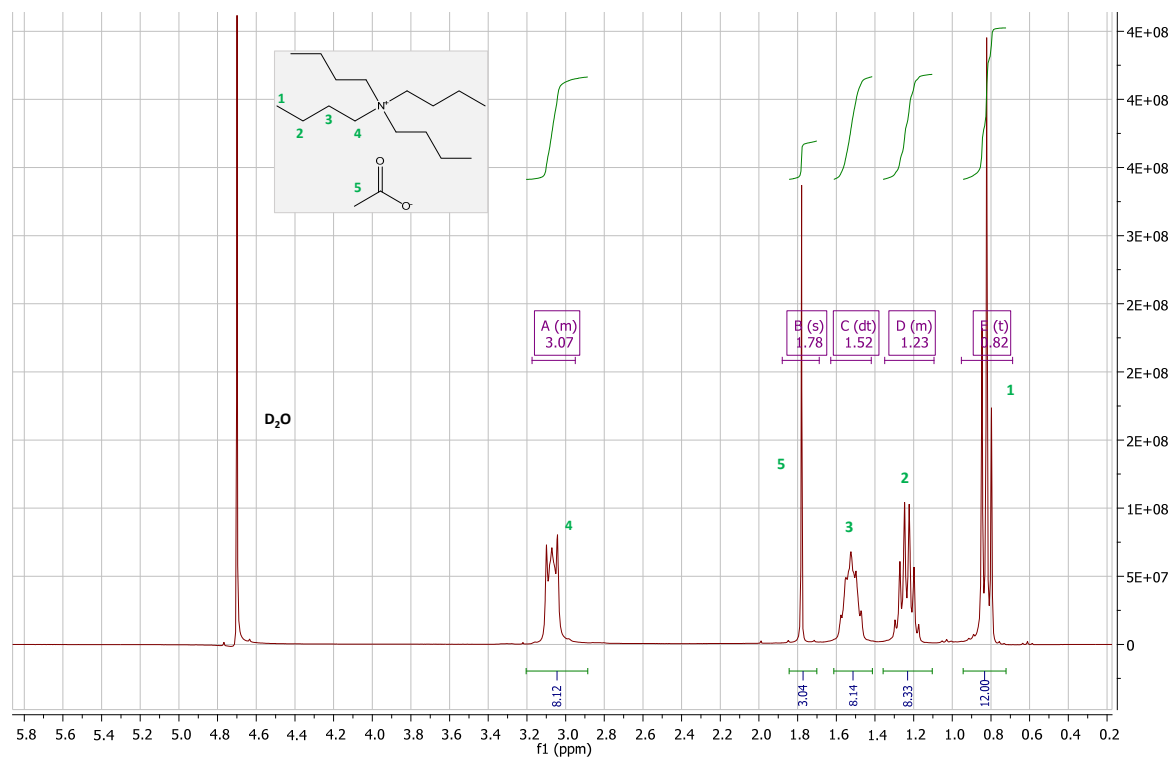

Figure S4 –  $^1H$  NMR spectrum of  $[N_{444}][CH_3COO]$ .

## Phase diagrams of aqueous biphasic systems

**Table S1** – Experimental binodal data in weight percent (wt.%) for the ternary systems comprising IL + K<sub>2</sub>HPO<sub>4</sub> + H<sub>2</sub>O at 25 °C and atmospheric pressure.

| [P <sub>4444</sub> ][HCOO] |         | [P <sub>4444</sub> ][CH <sub>3</sub> COO] |         | [N <sub>4444</sub> ][HCOO] |         | [N <sub>4444</sub> ][CH <sub>3</sub> COO] |         |
|----------------------------|---------|-------------------------------------------|---------|----------------------------|---------|-------------------------------------------|---------|
| [IL]                       | [Salt]  | [IL]                                      | [Salt]  | [IL]                       | [Salt]  | [IL]                                      | [Salt]  |
| 35.1691                    | 5.4490  | 35.5932                                   | 3.7561  | 40.8074                    | 2.4426  | 52.6928                                   | 1.3673  |
| 26.8586                    | 6.9669  | 31.2548                                   | 4.4559  | 33.0900                    | 4.6188  | 42.1895                                   | 2.8191  |
| 23.5034                    | 8.0978  | 27.8273                                   | 5.6931  | 29.3327                    | 5.4917  | 38.1318                                   | 3.8040  |
| 21.5970                    | 8.8678  | 24.8217                                   | 6.8877  | 27.2292                    | 6.3648  | 34.3294                                   | 4.9893  |
| 19.6753                    | 9.9005  | 22.8133                                   | 8.3556  | 25.6839                    | 7.0465  | 31.5019                                   | 5.5568  |
| 18.4047                    | 10.6356 | 20.8526                                   | 9.5070  | 24.1267                    | 7.4113  | 27.3984                                   | 7.0579  |
| 16.2599                    | 11.4918 | 19.1209                                   | 10.8533 | 22.3843                    | 8.4369  | 25.5928                                   | 7.5596  |
| 15.2482                    | 11.9190 | 17.5101                                   | 11.3287 | 20.7199                    | 9.3772  | 24.5210                                   | 8.1332  |
| 14.4142                    | 12.3703 | 15.6797                                   | 12.1632 | 19.9067                    | 9.8886  | 23.4534                                   | 8.6494  |
| 13.9012                    | 12.8840 | 14.3802                                   | 12.8375 | 19.2834                    | 10.2287 | 22.5100                                   | 9.1246  |
| 13.3304                    | 13.0063 | 12.7553                                   | 14.0715 | 18.4272                    | 10.6092 | 21.5213                                   | 9.8060  |
| 12.7548                    | 13.2281 | 12.0606                                   | 14.4290 | 17.5023                    | 11.2539 | 20.4229                                   | 10.6400 |
| 11.8842                    | 13.8788 | 11.4743                                   | 14.8912 | 15.9431                    | 12.3725 | 19.8638                                   | 10.8027 |
| 11.6564                    | 14.1552 | 10.8315                                   | 15.2955 | 15.4259                    | 12.6394 | 19.0971                                   | 11.2972 |
| 11.2533                    | 14.5113 | 9.9008                                    | 16.2426 | 14.5992                    | 13.3205 | 18.6589                                   | 11.4143 |
| 10.7247                    | 14.8377 | 9.3743                                    | 16.5995 | 14.2164                    | 13.6204 | 17.6985                                   | 12.2450 |
| 10.2978                    | 14.9536 | 8.9120                                    | 16.7947 | 13.8757                    | 13.8712 | 16.9196                                   | 12.8548 |
| 9.6091                     | 15.5431 | 8.3248                                    | 17.4476 | 13.4918                    | 13.9835 | 16.3937                                   | 13.1342 |
| 9.1259                     | 15.8634 | 7.9796                                    | 17.5590 | 12.6482                    | 14.6921 | 15.7895                                   | 13.6139 |
| 8.7817                     | 15.9494 | 7.5069                                    | 17.9754 | 12.1168                    | 15.0961 | 14.9020                                   | 14.5056 |
| 8.3005                     | 16.2746 | 7.0445                                    | 18.3550 | 11.4978                    | 15.6219 | 14.3997                                   | 14.9188 |
| 7.9041                     | 16.5472 | 6.7863                                    | 18.4600 | 11.1098                    | 15.9874 | 13.9135                                   | 15.3149 |
| 7.6120                     | 16.7434 | 6.4822                                    | 18.7304 | 10.7452                    | 16.0064 | 13.4830                                   | 15.6132 |
| 7.4033                     | 16.8991 | 6.2180                                    | 18.9473 | 10.3904                    | 16.3973 | 13.0648                                   | 15.9950 |
| 7.1020                     | 17.0853 | 5.9080                                    | 19.1420 | 9.8980                     | 16.8662 | 12.6597                                   | 16.2751 |
| 6.7693                     | 17.2944 | 5.7320                                    | 19.1750 | 9.7101                     | 17.0123 | 12.4115                                   | 16.4583 |
| 6.3981                     | 17.6693 | 5.5820                                    | 19.2311 | 9.5399                     | 17.0673 | 11.9820                                   | 16.8296 |

**Table S1 (cont.)** – Experimental binodal data in weight percent (wt.%) for the ternary systems comprising IL + K<sub>2</sub>HPO<sub>4</sub> + H<sub>2</sub>O at 25 °C and atmospheric pressure.

| [P <sub>4444</sub> ][HCOO] |         | [P <sub>4444</sub> ][CH <sub>3</sub> COO] |         | [N <sub>4444</sub> ][HCOO] |         | [N <sub>4444</sub> ][CH <sub>3</sub> COO] |         |
|----------------------------|---------|-------------------------------------------|---------|----------------------------|---------|-------------------------------------------|---------|
| [IL]                       | [Salt]  | [IL]                                      | [Salt]  | [IL]                       | [Salt]  | [IL]                                      | [Salt]  |
| 6.0907                     | 17.9341 | 5.4661                                    | 19.2685 | 9.2969                     | 17.3232 | 11.5724                                   | 17.1908 |
| 5.8984                     | 18.1005 | 5.2437                                    | 19.5589 | 8.9973                     | 17.6344 | 11.2404                                   | 17.4821 |
|                            |         | 5.0588                                    | 19.6678 | 8.8686                     | 17.7291 | 10.7974                                   | 17.8877 |
|                            |         | 4.7985                                    | 20.1228 | 8.6848                     | 17.8849 | 10.5225                                   | 18.2173 |
|                            |         | 4.6455                                    | 20.2349 | 8.3477                     | 18.1941 | 9.9202                                    | 19.1059 |
|                            |         | 4.4699                                    | 20.4634 | 8.1482                     | 18.3746 | 7.7064                                    | 20.9842 |
|                            |         | 4.3164                                    | 20.6273 | 7.9399                     | 18.5370 | 7.5566                                    | 21.0193 |
|                            |         | 4.1818                                    | 20.7734 | 7.6888                     | 18.7887 | 7.2858                                    | 21.3700 |
|                            |         | 4.0323                                    | 21.0109 | 7.4791                     | 19.0184 | 6.7998                                    | 22.1351 |
|                            |         | 3.8743                                    | 20.9984 | 7.1814                     | 19.2434 | 6.6689                                    | 22.2512 |
|                            |         | 3.7362                                    | 21.2295 | 6.9828                     | 19.4893 | 6.4692                                    | 22.5164 |
|                            |         | 3.6359                                    | 21.3139 | 6.8230                     | 19.6143 | 6.2704                                    | 22.7621 |
|                            |         |                                           |         | 6.5616                     | 19.9284 | 6.0214                                    | 23.0103 |
|                            |         |                                           |         | 6.3880                     | 20.0629 | 5.8835                                    | 23.1041 |
|                            |         |                                           |         | 6.2495                     | 20.2886 | 5.7844                                    | 23.1887 |
|                            |         |                                           |         | 6.0352                     | 20.4913 | 5.6434                                    | 23.3389 |
|                            |         |                                           |         | 5.9144                     | 20.6329 | 5.3844                                    | 23.8779 |
|                            |         |                                           |         | 5.7277                     | 20.8213 | 5.2179                                    | 24.2330 |
|                            |         |                                           |         | 5.6774                     | 20.8342 | 5.0717                                    | 24.1945 |
|                            |         |                                           |         | 5.5579                     | 20.9484 | 4.9153                                    | 24.4225 |
|                            |         |                                           |         | 5.3441                     | 21.2250 | 4.7468                                    | 24.6597 |
|                            |         |                                           |         | 5.2139                     | 21.3647 | 4.6400                                    | 24.7377 |
|                            |         |                                           |         | 5.0634                     | 21.5500 |                                           |         |
|                            |         |                                           |         | 4.9553                     | 21.7015 |                                           |         |
|                            |         |                                           |         | 4.8402                     | 21.8318 |                                           |         |

**Table S2** – Experimental binodal data in weight percent (wt.%) for the ternary systems comprising IL + K<sub>3</sub>C<sub>6</sub>H<sub>5</sub>O<sub>7</sub> + H<sub>2</sub>O at 25 °C and atmospheric pressure.

| [P <sub>4444</sub> ][HCOO] |         | [P <sub>4444</sub> ][CH <sub>3</sub> COO] |         | [N <sub>4444</sub> ][HCOO] |         | [N <sub>4444</sub> ][CH <sub>3</sub> COO] |         |
|----------------------------|---------|-------------------------------------------|---------|----------------------------|---------|-------------------------------------------|---------|
| [IL]                       | [Salt]  | [IL]                                      | [Salt]  | [IL]                       | [Salt]  | [IL]                                      | [Salt]  |
| 53.7479                    | 6.2906  | 61.7189                                   | 6.3598  | 42.7799                    | 10.9536 | 43.2048                                   | 7.0781  |
| 47.1037                    | 7.8989  | 54.3210                                   | 8.6140  | 38.2282                    | 12.0291 | 42.0219                                   | 7.6076  |
| 43.3960                    | 9.4465  | 33.3609                                   | 14.6900 | 33.5586                    | 13.8127 | 40.8721                                   | 7.5239  |
| 40.0179                    | 10.8122 | 29.8287                                   | 16.6166 | 29.9976                    | 15.6567 | 35.9117                                   | 10.2004 |
| 37.2514                    | 12.0353 | 26.0103                                   | 19.0718 | 26.6407                    | 18.0096 | 33.8312                                   | 11.7778 |
| 35.0406                    | 12.8132 | 22.5641                                   | 21.6804 | 25.0470                    | 18.8095 | 30.3810                                   | 14.4390 |
| 32.6162                    | 13.9453 | 19.8458                                   | 23.6747 | 22.8548                    | 20.5174 | 27.0978                                   | 17.1965 |
| 29.7596                    | 15.7505 | 17.7732                                   | 25.2821 | 20.9772                    | 22.1081 | 23.8509                                   | 20.0031 |
| 27.2236                    | 17.5081 | 15.6837                                   | 27.0571 | 19.1908                    | 23.3995 | 22.0817                                   | 21.6358 |
| 25.3328                    | 18.7913 | 14.3144                                   | 28.0871 | 17.9163                    | 24.4822 | 20.3462                                   | 23.3295 |
| 23.5705                    | 20.0308 | 13.3194                                   | 28.7676 | 16.7682                    | 25.2585 | 18.9674                                   | 24.6848 |
| 21.7125                    | 21.4209 | 12.1596                                   | 29.7981 | 15.5132                    | 26.4048 | 17.2584                                   | 26.4113 |
| 19.6496                    | 23.1772 | 11.2084                                   | 30.5835 | 14.1429                    | 27.9483 | 15.6011                                   | 28.1010 |
| 18.3074                    | 24.1676 | 10.3326                                   | 31.3395 | 13.2994                    | 28.6926 | 13.9483                                   | 29.8276 |
| 17.4630                    | 24.6442 | 9.6480                                    | 31.8361 | 12.5589                    | 29.2484 | 12.2809                                   | 31.6501 |
|                            |         | 8.9500                                    | 32.5326 | 11.8453                    | 29.9028 | 10.1959                                   | 34.0478 |
|                            |         | 8.4379                                    | 32.9464 | 11.2808                    | 30.3531 |                                           |         |
|                            |         |                                           |         | 10.6272                    | 31.1642 |                                           |         |
|                            |         |                                           |         | 10.0840                    | 31.7182 |                                           |         |
|                            |         |                                           |         | 9.5987                     | 32.1993 |                                           |         |
|                            |         |                                           |         | 8.9464                     | 32.8357 |                                           |         |
|                            |         |                                           |         | 8.4310                     | 33.4680 |                                           |         |
|                            |         |                                           |         | 7.9632                     | 33.9199 |                                           |         |
|                            |         |                                           |         | 7.6213                     | 34.2267 |                                           |         |
|                            |         |                                           |         | 7.2050                     | 34.6713 |                                           |         |
|                            |         |                                           |         | 6.7803                     | 35.2808 |                                           |         |
|                            |         |                                           |         | 6.4700                     | 35.7045 |                                           |         |
|                            |         |                                           |         | 6.2169                     | 35.9971 |                                           |         |
|                            |         |                                           |         | 6.0468                     | 36.0959 |                                           |         |
|                            |         |                                           |         | 5.8265                     | 36.3372 |                                           |         |



**Table S3** –  $A$ ,  $B$  and  $C$  parameters of the equation proposed by Merchuk et al.<sup>a</sup> and respective correlation coefficients,  $R^2$ , for the ternary systems comprising IL + salt + H<sub>2</sub>O systems at 25 °C and atmospheric pressure.

| IL                                        | Salt                                                        | $A \pm \sigma$     | $B \pm \sigma$     | $10^5(C \pm \sigma)$ | $R^2$ |
|-------------------------------------------|-------------------------------------------------------------|--------------------|--------------------|----------------------|-------|
| [P <sub>4444</sub> ][HCOO]                | K <sub>2</sub> HPO <sub>4</sub>                             | $67.90 \pm 7.09$   | $-0.3440 \pm 0.04$ | $17.62 \pm 2.39$     | 0.999 |
|                                           | C <sub>6</sub> H <sub>5</sub> K <sub>3</sub> O <sub>7</sub> | $105.56 \pm 12.03$ | $-0.2978 \pm 0.04$ | $2.25 \pm 0.72$      | 0.999 |
| [P <sub>4444</sub> ][CH <sub>3</sub> COO] | K <sub>2</sub> HPO <sub>4</sub>                             | $91.44 \pm 16.50$  | $-0.4569 \pm 0.07$ | $13.53 \pm 3.00$     | 0.999 |
|                                           | C <sub>6</sub> H <sub>5</sub> K <sub>3</sub> O <sub>7</sub> | $150.21 \pm 23.58$ | $-0.3727 \pm 0.05$ | $1.94 \pm 0.65$      | 0.999 |
| [N <sub>4444</sub> ][HCOO]                | K <sub>2</sub> HPO <sub>4</sub>                             | $69.30 \pm 2.54$   | $-0.3722 \pm 0.02$ | $9.07 \pm 0.72$      | 0.999 |
|                                           | C <sub>6</sub> H <sub>5</sub> K <sub>3</sub> O <sub>7</sub> | $120.02 \pm 13.69$ | $-0.3328 \pm 0.03$ | $2.01 \pm 0.27$      | 0.999 |
| [N <sub>4444</sub> ][CH <sub>3</sub> COO] | K <sub>2</sub> HPO <sub>4</sub>                             | $75.74 \pm 2.78$   | $-0.3875 \pm 0.02$ | $5.53 \pm 0.56$      | 0.999 |
|                                           | C <sub>6</sub> H <sub>5</sub> K <sub>3</sub> O <sub>7</sub> | $80.03 \pm 5.39$   | $-0.2454 \pm 0.02$ | $1.55 \pm 0.26$      | 0.996 |

<sup>a</sup>[IL] =  $A \exp[(B \times [\text{Salt}]^{0.5}) - (C \times [\text{Salt}]^3)]$ , where [IL] and [Salt] represent the IL and salt weight percent data (wt.%), respectively, and  $A$ ,  $B$ , and  $C$  are the parameters obtained by regression of the experimental data. Equation reported in Merchuk, J.C.; Andrews, B.A.; Asenjo, J.A. Aqueous two-phase systems for protein separation studies on phase inversion. *J. Chromatogr. B Biomed. Appl.* **1998**, 711, 285–293, doi:10.1016/S0378-4347(97)00594-X.

**Table S4** – Experimental tie-lines (TLs) in weight percent (wt.%) and respective lengths (TLL) for ternary systems comprising IL + salt + H<sub>2</sub>O systems at 25 °C and atmospheric pressure. Initial mixture compositions are represented as [IL]<sub>M</sub> and [Salt]<sub>M</sub>, whereas IL-rich and salt-rich phases compositions are denoted by [IL]<sub>IL</sub>, [Salt]<sub>IL</sub>, [IL]<sub>Salt</sub> and [Salt]<sub>Salt</sub>.

| IL                                        | Salt                                                        | [IL] <sub>IL</sub> | [Salt] <sub>IL</sub> | [IL] <sub>M</sub> | [Salt] <sub>M</sub> | [IL] <sub>Salt</sub> | [Salt] <sub>Salt</sub> | TLL   |
|-------------------------------------------|-------------------------------------------------------------|--------------------|----------------------|-------------------|---------------------|----------------------|------------------------|-------|
| [P <sub>4444</sub> ][HCOO]                | K <sub>2</sub> HPO <sub>4</sub>                             | 36.58              | 3.76                 | 24.69             | 28.13               | 0.00                 | 79.72                  | 84.30 |
|                                           | C <sub>6</sub> H <sub>5</sub> K <sub>3</sub> O <sub>7</sub> | 38.54              | 10.80                | 24.97             | 27.53               | 0.14                 | 57.87                  | 60.74 |
| [P <sub>4444</sub> ][CH <sub>3</sub> COO] | K <sub>2</sub> HPO <sub>4</sub>                             | 36.58              | 3.95                 | 24.69             | 28.13               | 0.00                 | 78.11                  | 82.69 |
|                                           | C <sub>6</sub> H <sub>5</sub> K <sub>3</sub> O <sub>7</sub> | 38.48              | 12.60                | 24.96             | 27.77               | 0.37                 | 55.09                  | 57.07 |
| [N <sub>4444</sub> ][HCOO]                | K <sub>2</sub> HPO <sub>4</sub>                             | 36.57              | 2.93                 | 24.70             | 28.13               | 0.00                 | 80.24                  | 85.54 |
|                                           | C <sub>6</sub> H <sub>5</sub> K <sub>3</sub> O <sub>7</sub> | 42.25              | 9.52                 | 24.84             | 27.77               | 0.51                 | 53.20                  | 60.41 |
| [N <sub>4444</sub> ][CH <sub>3</sub> COO] | K <sub>2</sub> HPO <sub>4</sub>                             | 42.18              | 2.28                 | 24.93             | 27.95               | 0.00                 | 64.98                  | 75.57 |
|                                           | C <sub>6</sub> H <sub>5</sub> K <sub>3</sub> O <sub>7</sub> | 55.78              | 2.16                 | 25.11             | 28.01               | 3.16                 | 46.50                  | 68.81 |

## Extraction of transferrin

**Table S5** – Extraction efficiencies ( $EE_{TF}$ , %) and recovery yield ( $Y_{TF}$ , %) of transferrin achieved with ternary systems comprising IL + salt + H<sub>2</sub>O at 25 °C with a controlled pH of  $\approx 7.4 \pm 1$ .

| IL                                        | Salt                                                        | pH <sub>IL-rich phase</sub> | $EE_{TF}$ % | $Y_{TF}$ %       |
|-------------------------------------------|-------------------------------------------------------------|-----------------------------|-------------|------------------|
| [P <sub>4444</sub> ][HCOO]                | K <sub>2</sub> HPO <sub>4</sub>                             | $8.19 \pm 0.16$             | 100         | $99.16 \pm 1.56$ |
| [P <sub>4444</sub> ][CH <sub>3</sub> COO] |                                                             | $7.74 \pm 0.16$             | 100         | $98.28 \pm 0.87$ |
| [N <sub>4444</sub> ][HCOO]                |                                                             | $7.65 \pm 0.08$             | 100         | $86.73 \pm 1.57$ |
| [N <sub>4444</sub> ][CH <sub>3</sub> COO] |                                                             | $8.16 \pm 0.15$             | 100         | 100.00           |
| [P <sub>4444</sub> ][HCOO]                | C <sub>6</sub> H <sub>5</sub> K <sub>3</sub> O <sub>7</sub> | $6.73 \pm 0.15$             | 100         | $98.01 \pm 0.98$ |
| [P <sub>4444</sub> ][CH <sub>3</sub> COO] |                                                             | $6.69 \pm 0.05$             | 100         | $86.19 \pm 0.02$ |
| [N <sub>4444</sub> ][HCOO]                |                                                             | $6.34 \pm 0.01$             | 100         | $86.56 \pm 0.45$ |
| [N <sub>4444</sub> ][CH <sub>3</sub> COO] |                                                             | $6.98 \pm 0.02$             | 100         | $98.73 \pm 1.59$ |

## Molecular docking

**Table S6** – Docking affinity energy and interacting atoms predicted by AutoDock Vina for transferrin (pH 6.5) + ILs ions.

| Compound                           | Affinity (kcal/mol) | Type of interaction | From                              | To                                 | Distance (Å) |
|------------------------------------|---------------------|---------------------|-----------------------------------|------------------------------------|--------------|
| [N <sub>4444</sub> ] <sup>+</sup>  | -4.0                | Hydrophobic         | ALA658                            | [N <sub>4444</sub> ] <sup>+</sup>  | 4.04         |
|                                    |                     |                     | [N <sub>4444</sub> ] <sup>+</sup> | LYS657                             | 3.71         |
| [P <sub>4444</sub> ] <sup>+</sup>  | -3.5                | Electrostatic       | [P <sub>4444</sub> ] <sup>+</sup> | ASP477                             | 4.93         |
|                                    |                     | Hydrophobic         |                                   | ARG475                             | 4.51         |
| [CH <sub>3</sub> COO] <sup>-</sup> | -3.4                | Electrostatic       | ARG644                            | [CH <sub>3</sub> COO] <sup>-</sup> | 4.71         |
|                                    |                     | Hydrogen Bond       | ASN411                            |                                    | 2.20         |
|                                    |                     |                     | GLU423                            |                                    | 2.04         |
|                                    |                     |                     | ASN584                            |                                    | 2.50         |
|                                    |                     |                     | ARG644                            |                                    | 2.16         |
| [HCOO] <sup>-</sup>                | -3.0                | Hydrogen Bond       | ARG456                            | [HCOO] <sup>-</sup>                | 1.92         |
|                                    |                     |                     |                                   |                                    | 2.22         |
|                                    |                     |                     | GLY459                            |                                    | 2.05         |
|                                    |                     |                     | TYR517                            |                                    | 2.31         |

**Table S7** – Docking affinity energy and interacting atoms predicted by AutoDock Vina for transferrin (pH 8) + ILs ions.

| Compound                           | Affinity (kcal/mol) | Type of interaction | From                              | To                                 | Distance (Å)  |        |
|------------------------------------|---------------------|---------------------|-----------------------------------|------------------------------------|---------------|--------|
| [N <sub>4444</sub> ] <sup>+</sup>  | -3.8                | Hydrophobic         | [N <sub>4444</sub> ] <sup>+</sup> | PRO508                             | 4.70          |        |
|                                    |                     |                     | PHE395                            | [N <sub>4444</sub> ] <sup>+</sup>  | 4.50          |        |
|                                    |                     | Electrostatic       | [N <sub>4444</sub> ] <sup>+</sup> | GLU375                             | 4.39          |        |
|                                    |                     | Hydrogen Bond       |                                   |                                    | 3.41          |        |
| [P <sub>4444</sub> ] <sup>+</sup>  | -4.0                | Hydrophobic         | PHE186                            | [P <sub>4444</sub> ] <sup>+</sup>  | 5.28          |        |
| [CH <sub>3</sub> COO] <sup>-</sup> | -3.3                | Electrostatic       | ARG644                            | [CH <sub>3</sub> COO] <sup>-</sup> | 4.67          |        |
|                                    |                     | Hydrogen Bond       | ASN411                            |                                    | 2.07          |        |
|                                    |                     |                     | GLU423                            |                                    | 1.99          |        |
|                                    |                     |                     | ASN584                            |                                    | 2.64          |        |
|                                    |                     |                     | ARG644                            |                                    | 2.39          |        |
|                                    |                     |                     |                                   |                                    | 2.07          |        |
|                                    |                     | [HCOO] <sup>-</sup> | -3.1                              |                                    | Hydrogen Bond | ALA458 |
| GLY459                             | 2.02                |                     |                                   |                                    |               |        |
| TYR517                             | 2.30                |                     |                                   |                                    |               |        |
| [HCOO] <sup>-</sup>                | THR452              |                     |                                   | 2.96                               |               |        |
